# Supplementary material
Source: HighWire-hosted journal article supplement (http://jpet.aspetjournals.org/highwire/filestream/136647/field_highwire_adjunct_files/0/jpet225375_suppl_fig_1.pdf)

## **SUPPLEMENTAL DATA**

### **Early Administration of Carvedilol Protected Against Doxorubicin-Induced**

#### **Cardiomyopathy**

Yung-Lung Chen, Sheng-Ying Chung, Han-Tan Chai, Chih-Hung Chen, Chu-Feng Liu, Yi-Ling Chen, Tien-Hung Huang, Yen-Yi Zhen, Pei-Hsun Sung, Cheuk-Kwan Sun, Sarah Chua, Hung-I Lu, Fan-Yen Lee, Jiunn-Jye Sheu, Hon-Kan Yip

*The Journal of Pharmacology and Experimental Therapeutics*

#### **Supplement Figure 1**

#### **Doxorubicin treatment of dose-dependent enhancement of left ventricular (LV) fibrosis and DNA-damaged biomarkers by day 28 after cardiotoxicity induction**

**A to D)** Microscopic findings (100x) of Masson's Trichrome staining for identifying the fibrotic area in LV myocardium among four groups, and **E to H)** Microscopic findings (100x) of Sirius red staining for identifying the collagen deposition in LV myocardium among four groups. Scale bars in right lower corner represent 100 $\mu$ m. The results of IHC staining showed that the fibrotic area and collagen-deposition area in LV myocardium progressively increased as the DOX-dose increased. **I to L)** IF microscopic finding (200x) illustrated the 53BP1+ cells (red color), and **M to P)** IF microscopic finding (400x) illustrated the  $\gamma$ -H2AX+ cells (red color) in LV myocardium. Scale bars in right lower corner represent 20 $\mu$ m. The results of IF staining displayed that 53BP1+ and  $\gamma$ -H2AX+ cells, two markers of DNA damage, were identical to the expression of fibrosis in LV myocardium.

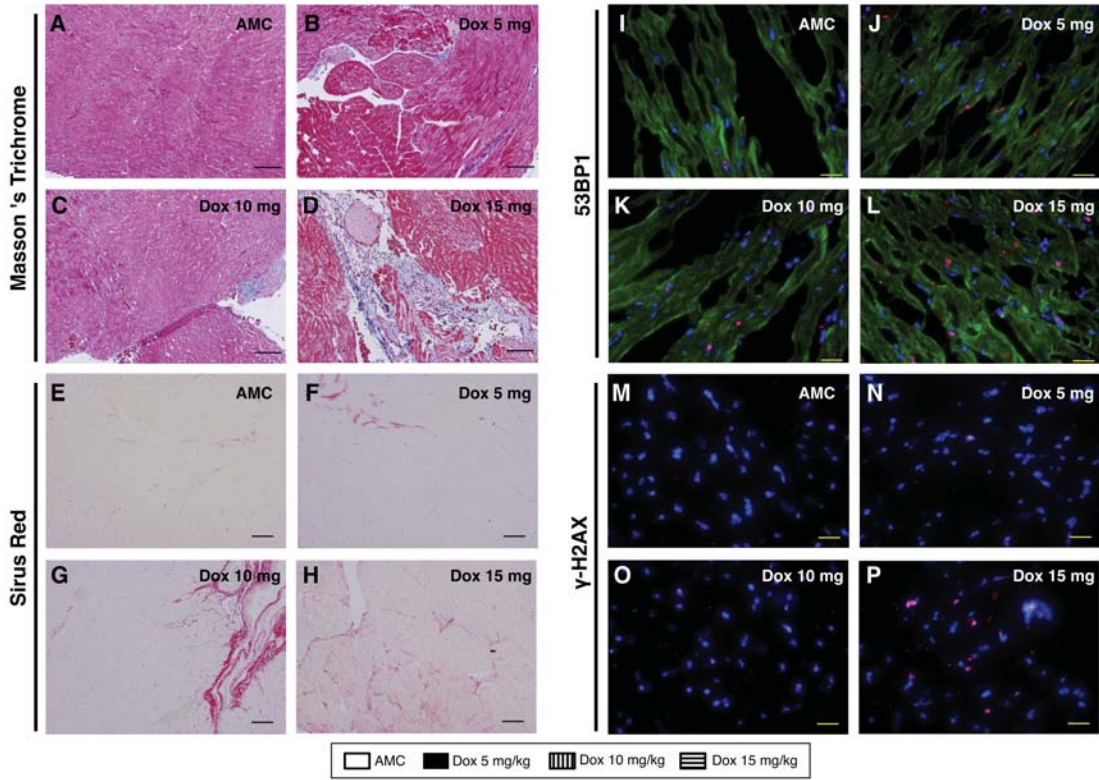

Supplement: jpet225375_suppl_fig_1.pdf [file jpet225375_suppl_fig_1.pdf]
